# Supplementary material for: Adaptation and validation of the ACMG/AMP variant classification framework for MYH7-associated inherited cardiomyopathies: recommendations by ClinGen’s Inherited Cardiomyopathy Expert Panel
Source: PubMed Central journal article supplement (PMC5876064; doi:10.1038/gim.2017.218), 2018-01-04
Supplement: NIHMS917178-supplement-Supplementary_figures.pdf [file NIHMS917178-supplement-Supplementary_figures.pdf]

**A. Variants by classification**

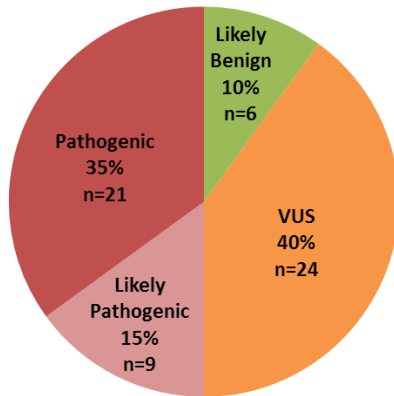

**B. Summary of ClinVar classification discrepancies**

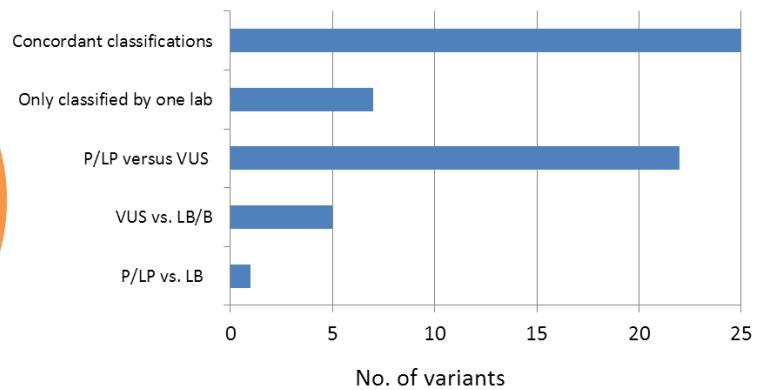

**C. Variant change type**

| Variant Type | N         |
|--------------|-----------|
| Missense     | 50        |
| FS           | 1         |
| Silent       | 2         |
| Intronic     | 2         |
| Deletion     | 3         |
| Splice       | 1         |
| Nonsense     | 1         |
| <b>Total</b> | <b>60</b> |

**Supplementary Figure 1.** Summary statistics for 60 *MYH7* pilot variants at the time of variant selection. Variants with a broad spectrum of classifications and evidence levels were selected. **A.** Classifications of 60 pilot variants from the Partners Laboratory for Molecular Medicine (LMM) at the time of variant selection. **B.** Discrepancies in classifications listed in ClinVar between main cardiomyopathy labs. P = Pathogenic, LP = Likely Pathogenic, VUS = Variant of uncertain significance, LB = Likely benign, B = Benign. **C.** Breakdown of 60 pilot variants by type.

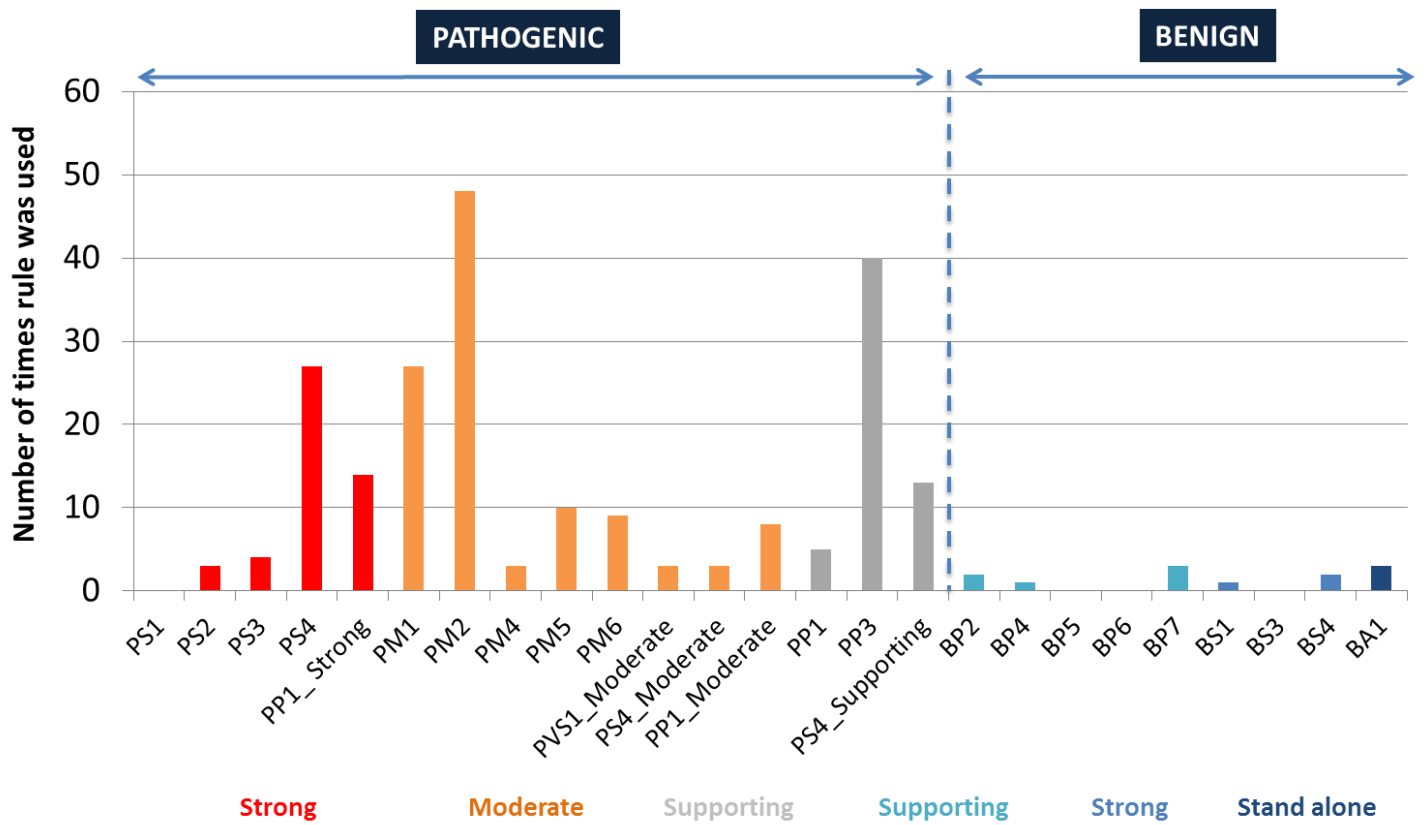

**Supplementary Figure 2.** Summary of rules that were applied to the 60 MYH7 variants. The not applicable or removed rules are not included above. The variants covered a range of classifications from pathogenic to benign and allowed for 21/25 rules to be tested.

## Variant Concordance

## Stepwise Summary

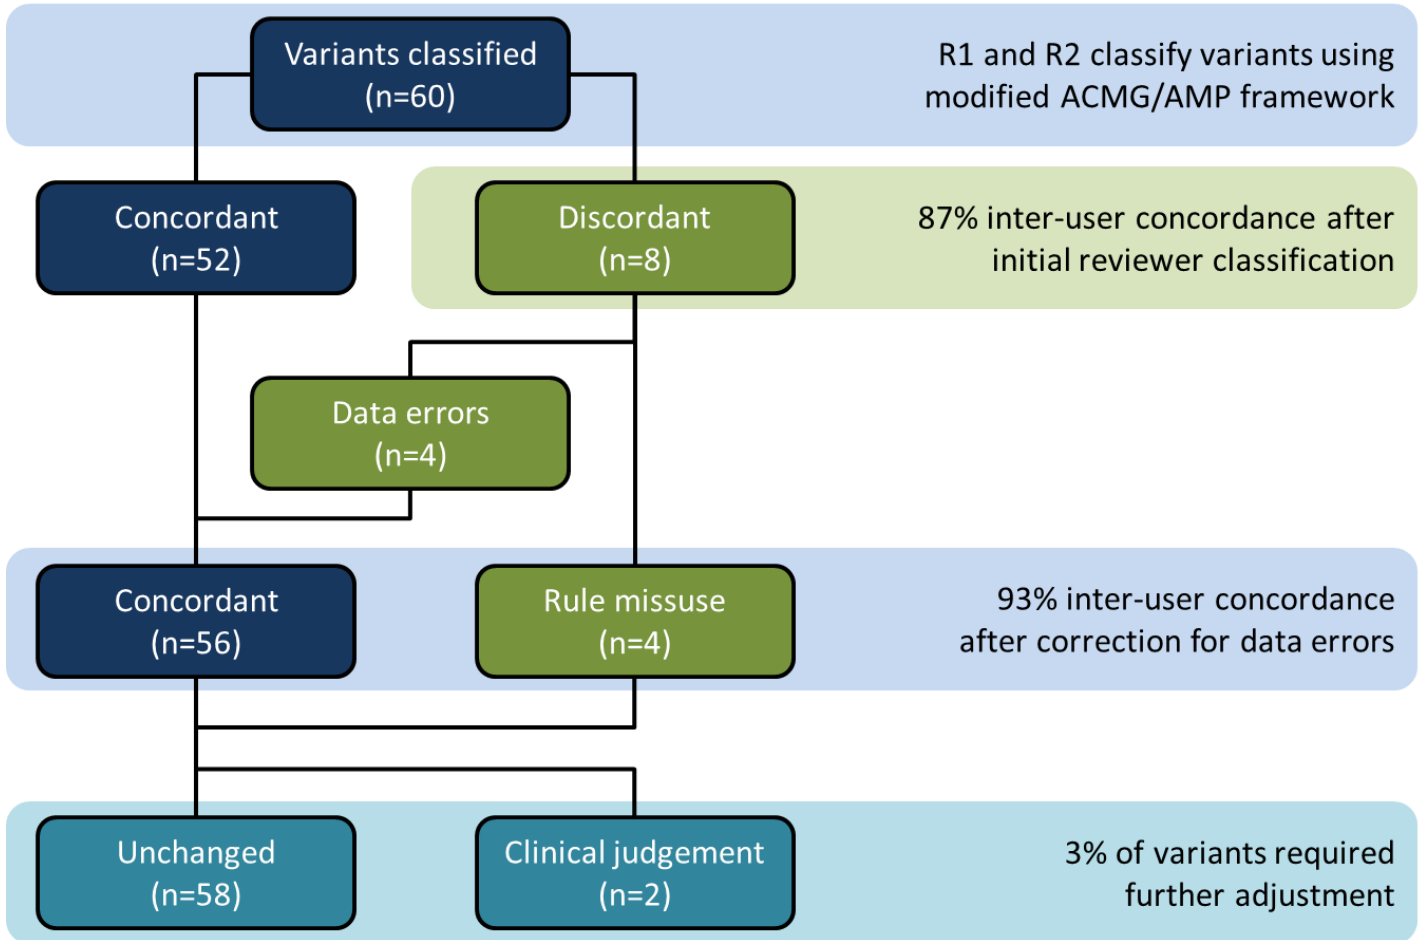

**Supplementary Figure 3:** Summary of underlying factors for variant classification discordance. Numbers in (n) represent the number of variants. R1/R2 = Reviewers 1 and 2.
